# Supplementary material for: Predictive Value of the BSID-II and the Bayley-III for Early School Age Cognitive Function in Very Preterm Infants
Source: PubMed Central journal article supplement — Glob Pediatr Health. 2020 Nov 20;7:2333794X20973146. doi: 10.1177/2333794X20973146 (PMC7683841; doi:10.1177/2333794x20973146), 2020-11-20
Supplement: sj-pdf-1-gph-10.1177_2333794X20973146.pdf [file sj-pdf-1-gph-10.1177_2333794X20973146.pdf]

**Predictive Value of the BSID-II and the Bayley-III for Early School Age  
Cognitive Function in Very Preterm Infants**  
Supplementary Table: Characteristics of Participants Eligible for the WPPSI

|                                    |                 | Participants Eligible and<br>WPPSI Performed (n=31) | Participants Eligible and<br>WPPSI Not Performed (n=14) | p value |
|------------------------------------|-----------------|-----------------------------------------------------|---------------------------------------------------------|---------|
| <b>Maternal Demographic Data</b>   |                 |                                                     |                                                         |         |
| Age, y, mean                       |                 | 26.52 (6.14)                                        | 28 (7.78)                                               | .494    |
| Married status*, n (%)             |                 |                                                     |                                                         | 1       |
|                                    | Single          | 17 (54.84%)                                         | 7 (50%)                                                 |         |
|                                    | Married         | 12 (38.71%)                                         | 5 (35.71%)                                              |         |
| Maternal race or ethnicity*, n (%) |                 |                                                     |                                                         | .077    |
|                                    | Black           | 18 (58.06%)                                         | 10 (71.43%)                                             |         |
|                                    | White           | 11 (35.48%)                                         | 1 (7.14%)                                               |         |
|                                    | Asian           | 0 (0%)                                              | 1 (7.14%)                                               |         |
|                                    | Hispanic        | 2 (6.45%)                                           | 0 (0%)                                                  |         |
| Maternal education*, n (%)         |                 |                                                     |                                                         | .501    |
|                                    | < High School   | 11 (35.48%)                                         | 4 (28.57%)                                              |         |
|                                    | 2 years college | 2 (6.45%)                                           | 3 (21.43%)                                              |         |
|                                    | 4 years college | 8 (25.81%)                                          | 2 (14.29%)                                              |         |
|                                    | Graduate level  | 2 (6.45%)                                           | 1 (7.14%)                                               |         |
| <b>Infant Birth Data</b>           |                 |                                                     |                                                         |         |
| Gender                             |                 |                                                     |                                                         | .513    |
|                                    | Male            | 13 (41.94%)                                         | 4 (28.57%)                                              |         |
|                                    | Female          | 18 (58.06%)                                         | 10 (71.43%)                                             |         |
| Gestational age, wk                |                 | 28.35 (2.52)                                        | 27.86 (2.91)                                            | .562    |
| Birthweight, g                     |                 | 1132.19 (356.54)                                    | 1145.14 (436.32)                                        | .917    |
| Multiple gestation, n (%)          |                 | 14 (45.16%)                                         | 3 (21.43%)                                              | .188    |
| Small for gestational age, n (%)   |                 | 1 (3.23%)                                           | 0 (0%)                                                  | 1       |
| Infant race or ethnicity, n (%)    |                 |                                                     |                                                         | .355    |
|                                    | Black           | 18 (58.06%)                                         | 9 (64.29%)                                              |         |
|                                    | White           | 13 (41.94%)                                         | 4 (28.57%)                                              |         |
|                                    | Hispanic        | 0 (0%)                                              | 0 (0%)                                                  |         |
|                                    | Asian           | 0 (0%)                                              | 1 (7.14%)                                               |         |
| <b>Neonatal Risk Factors</b>       |                 |                                                     |                                                         |         |
| Bronchopulmonary dysplasia, n (%)  |                 | 6 (19.35%)                                          | 1 (7.14%)                                               | .407    |

|                                                             |               |               |      |
|-------------------------------------------------------------|---------------|---------------|------|
| Intraventricular hemorrhage grade 3 or 4, n (%)             | 1 (3.23%)     | 2 (14.29%)    | .225 |
| Necrotizing enterocolitis*, n (%)                           | 2 (6.45%)     | 1 (7.14%)     | 1    |
| Patent ductus arteriosus ligation, n (%)                    | 4 (12.9%)     | 3 (21.43%)    | .659 |
| Retinopathy of prematurity requiring laser treatment, n (%) | 2 (6.45%)     | 1 (7.14%)     | 1    |
| Sepsis, n (%)                                               | 6 (19.35%)    | 2 (14.29%)    | 1    |
| Length of stay, d                                           | 65.13 (86.97) | 93.79 (82.98) | .305 |
| Postnatal steroids, n (%)                                   | 4 (12.9%)     | 3 (21.43%)    | .659 |
| Mechanical ventilation, n (%)                               | 22 (70.97%)   | 9 (64.29%)    | .920 |
| <b>Later Risk Factors</b>                                   |               |               |      |
| Hearing loss, n (%)                                         | 2 (6.45%)     | 1 (7.14%)     | 1    |
| Blindness, n (%)                                            | 0 (0%)        | 0 (0%)        | 1    |
| Major neurologic abnormality, n (%)                         | 1 (3.23%)     | 3 (21.43%)    | .083 |
| Autism, n (%)                                               | 2 (6.45%)     | 0 (0%)        | 1    |
| Receiving EI*, n(%)                                         | 30 (96.77%)   | 10 (71.43%)   | 1    |
| <b>Study Characteristics</b>                                |               |               |      |
| Age in months at BSID-II                                    | 19.58 (1.75)  | 19.21 (2.33)  | .561 |
| Age in months at Bayley-III                                 | 19.48 (1.75)  | 18.79 (1.05)  | .175 |
| Age in months at WPPSI                                      | 47.39 (11.37) | -             | -    |

Data are presented as mean  $\pm$  SD or No. of %

\*Data analyzed included those for whom the outcome was known. Number missing for married status (4), maternal race (2), maternal education (12), NEC (1), received EI (4)
